# Supplementary material for: Feature-Based Molecular Networks Identification of Bioactive Metabolites from Three Plants of the Polynesian Cosmetopoeia Targeting the Dermal Papilla Cells of the Hair Cycle
Source: MDPI journal article supplement (doi:10.3390/molecules27010105), 2021-12-24
Supplement: s1 [file s1]

## SUPPLEMENTARY MATERIAL

# Feature-Based Molecular Networks Identification of Bioactive Metabolites from Three Plants of the Polynesian *Cosmetopoeia* Targeting the Dermal Papilla Cells of the Hair Cycle

Kristelle Hughes<sup>1</sup>, Raimana Ho<sup>1</sup>, Stéphane Greff<sup>2</sup>, Gaëtan Herbette<sup>3</sup>, Edith Filaire<sup>4,5</sup>, Edwige Ranouille<sup>4</sup>, Jean-Yves Berthon<sup>4</sup> & Phila Raharivelomanana<sup>1</sup>

<sup>1</sup> Université de la Polynésie Française, IFREMER, ILM, IRD, EIO UMR 241, BP 6570, F-98702 Faaa, Tahiti, French Polynesia; kristelle.hughes@doctorant.upf.pf (K.H.); raimana.ho@upf.pf (R.H.)

<sup>2</sup> Institut Méditerranéen de Biodiversité et d'Ecologie Marine et Continentale (IMBE), UMR 7263 CNRS, IRD, Aix Marseille Université, Avignon Université, Station Marine d'Endoume, rue de la Batterie des Lions, 13007 Marseille, France; stephane.greff@imbe.fr

<sup>3</sup> Aix Marseille Université, CNRS, Centrale Marseille, FSCM, Spectropole, Service 511, Campus Saint-Jérôme, 13397 Marseille, France; gaetan.herbette@univ-amu.fr

<sup>4</sup> Greentech SA, Biopôle Clermont-Limagne, 63360 Saint-Beauzire, France; edithfilaire@greentech.fr (E.F.); developpement@greentech.fr (E.R.); jeanyvesberthon@greentech.fr (J.-Y.B.)

<sup>5</sup> Université Clermont Auvergne, UMR 1019 INRA-Uca, UNH (Human Nutrition Unity), ECREIN Team, 63000 Clermont-Ferrand, France

\* Correspondence: phila.raharivelomanana@upf.pf

Table S1. Cell proliferation values before and after ln transformation as prepared for the feature quantification table

|                                    | BEAE   | BF3     | BF4     | CEWE   | CEAE    | CF3     | CF4     | CF5    | FEAE   | FF1    | FF2    | FF3    | FF4    |
|------------------------------------|--------|---------|---------|--------|---------|---------|---------|--------|--------|--------|--------|--------|--------|
| Values at 50 $\mu\text{g.ml}^{-1}$ | 1.29   | 1.09    | 1.06    | 1.50   | 0.85    | 0.76    | 0.89    | 1.20   | 1.31   | 1.43   | 1.17   | 1.34   | 1.38   |
| Ln-transformed values              | 0.2546 | 0.08618 | 0.05827 | 0.4055 | -0.1625 | -0.2744 | -0.1165 | 0.1823 | 0.2700 | 0.3577 | 0.1570 | 0.2927 | 0.3221 |

Table S2. List of significant features according to Pearson correlation coefficient for model including all three species

| <i>m/z</i> | retention<br>time (min) | correlation | <i>p</i> -value |
|------------|-------------------------|-------------|-----------------|
| 453.1552   | 11.81                   | -0.79       | 0.001           |
| 259.0243   | 10.98                   | -0.75       | 0.003           |
| 489.1044   | 9.25                    | -0.73       | 0.005           |
| 437.0881   | 11.61                   | -0.73       | 0.005           |
| 191.042    | 0.82                    | -0.71       | 0.006           |
| 463.0876   | 2.46                    | -0.71       | 0.007           |
| 575.2442   | 10.95                   | -0.71       | 0.007           |
| 607.2669   | 11.48                   | -0.70       | 0.008           |
| 563.272    | 9.12                    | -0.70       | 0.008           |
| 340.8268   | 15.42                   | -0.70       | 0.008           |
| 325.0437   | 13.50                   | -0.69       | 0.008           |
| 311.0926   | 12.73                   | -0.69       | 0.008           |
| 409.1657   | 11.50                   | -0.68       | 0.01            |
| 159.0664   | 7.19                    | -0.68       | 0.01            |
| 239.129    | 12.92                   | -0.65       | 0.02            |
| 433.2201   | 11.68                   | -0.64       | 0.02            |
| 303.051    | 9.23                    | -0.64       | 0.02            |
| 243.0299   | 10.49                   | -0.63       | 0.02            |
| 273.0405   | 12.25                   | -0.62       | 0.02            |
| 244.0649   | 1.47                    | -0.62       | 0.02            |
| 303.051    | 11.87                   | -0.61       | 0.03            |
| 503.1945   | 8.92                    | -0.60       | 0.03            |
| 662.2977   | 9.82                    | -0.59       | 0.03            |
| 160.8294   | 0.90                    | -0.59       | 0.04            |
| 663.138    | 5.78                    | -0.58       | 0.04            |
| 287.1976   | 8.60                    | -0.58       | 0.04            |
| 148.9409   | 14.91                   | -0.58       | 0.04            |
| 513.3066   | 11.74                   | -0.58       | 0.04            |
| 253.1234   | 8.94                    | -0.58       | 0.04            |
| 575.2477   | 11.22                   | -0.58       | 0.04            |
| 449.1542   | 11.47                   | -0.58       | 0.04            |
| 576.258    | 10.66                   | -0.58       | 0.04            |
| 248.9383   | 0.75                    | -0.57       | 0.04            |
| 335.0934   | 11.93                   | -0.57       | 0.04            |
| 223.1151   | 9.21                    | -0.57       | 0.04            |
| 303.051    | 10.18                   | -0.56       | 0.04            |
| 233.135    | 10.97                   | -0.56       | 0.05            |

|          |       |       |      |
|----------|-------|-------|------|
| 293.1855 | 10.97 | -0.56 | 0.05 |
| 116.9194 | 15.56 | -0.56 | 0.05 |
| 195.1223 | 9.84  | -0.56 | 0.05 |
| 194.0653 | 10.06 | -0.56 | 0.05 |
| 293.1868 | 11.23 | -0.56 | 0.05 |
| 115.9117 | 12.97 | -0.56 | 0.05 |
| 539.0931 | 11.78 | -0.56 | 0.05 |
| 303.0915 | 7.71  | -0.56 | 0.05 |
| 341.0703 | 10.51 | -0.55 | 0.05 |
| 265.108  | 10.16 | -0.55 | 0.05 |
| 339.0722 | 5.36  | 0.55  | 0.05 |
| 425.1248 | 12.44 | -0.55 | 0.05 |
| 559.2509 | 11.81 | -0.55 | 0.05 |
| 111.0088 | 1.10  | 0.55  | 0.05 |
| 589.2222 | 9.40  | -0.55 | 0.05 |
| 551.1621 | 6.03  | -0.55 | 0.05 |
